# Supplementary material for: Prevalence of depression, anxiety, and stress among internally displaced diabetic patients: Cross-sectional study, Kassala State, Sudan
Source: Research Square preprint supplement (doi:10.21203/rs.3.rs-7594930/v1), 2025-09-19
Supplement: Supplementary file 1 [file 87653447be315c01a0d256fb.docx]

## **Sociodemographic-generated data, DAS prevalence, and severity levels**

### Descriptive Statistics:

| N=141 | Range | Minimum | Maximum | Sum | Mean | | Std. Deviation | Variance |
| --- | --- | --- | --- | --- | --- | --- | --- | --- |
| Statistic | Std. Error |
| Total score | 12 | 2 | 14 | 1210 | 8.58 | 0.170 | 2.018 | 4.074 |
| Percentage | 57.15 | 9.52 | 66.67 | 5762.04 | 40.8655 | 0.80941 | 9.61122 | 92.376 |
| Depression | 5 | 0 | 5 | 345 | 2.45 | 0.086 | 1.024 | 1.049 |
| Anxiety | 6 | 0 | 6 | 356 | 2.52 | 0.100 | 1.187 | 1.408 |
| Stress | 7 | 0 | 7 | 509 | 3.61 | 0.103 | 1.223 | 1.497 |
| Prevalence Statistics |  |  |  |  |  |  |  |  |
| Depression Prevalence | 0.2381 | 0.0000 | 0.2381 | 16.4283 | 0.116513 | 0.0041091 | 0.0487932 | 0.002 |
| Anxiety Prevalence | 0.2857 | 0.0000 | 0.2857 | 16.9518 | 0.120226 | 0.0047606 | 0.0565292 | 0.003 |
| Stress Prevalence | 0.3333 | 0.0000 | 0.3333 | 24.2402 | 0.171916 | 0.0049065 | 0.0582617 | 0.003 |
| Total Prevalence | 0.5715 | 0.0952 | 0.6667 | 57.6204 | 0.408655 | 0.0080941 | 0.0961122 | 0.009 |

### DAS prevalence results details.

| **Row Labels** | **Depression-Prev** | **Anxiety-Prev** | **Stress- Prev** | **Total -prev** |
| --- | --- | --- | --- | --- |
| **Female** |  |  |  |  |
| **30 to 45** | **12.7%** | **12.9%** | **16.6%** | **42.2%** |
| Illiterate |  |  |  |  |
| Midle | 19.0% | 14.3% | 4.8% | 38.1% |
| Primary |  |  |  |  |
| High | 19.0% | 19.0% | 4.8% | 42.9% |
| Low | 11.9% | 9.5% | 19.0% | 40.5% |
| Midle | 10.7% | 10.7% | 20.2% | 41.7% |
| Secondary |  |  |  |  |
| High | 16.7% | 7.1% | 19.0% | 42.9% |
| Low | 14.3% | 14.3% | 16.7% | 45.2% |
| Midle | 9.5% | 16.7% | 7.1% | 33.3% |
| University |  |  |  |  |
| High | 15.9% | 14.3% | 19.0% | 49.2% |
| Low | 7.1% | 11.9% | 19.0% | 38.1% |
| Midle | 9.5% | 16.7% | 19.0% | 45.2% |
| **46 to 60** | **10.2%** | **12.3%** | **17.5%** | **40.1%** |
| Illiterate |  |  |  |  |
| Low | 9.5% | 9.5% | 19.0% | 38.1% |
| Midle | 9.5% | 14.3% | 4.8% | 28.6% |
| Primary |  |  |  |  |
| High | 11.1% | 15.9% | 20.6% | 47.6% |
| Low | 9.5% | 7.1% | 19.0% | 35.7% |
| Midle | 12.7% | 12.7% | 17.5% | 42.9% |
| Secondary |  |  |  |  |
| High | 11.1% | 12.7% | 22.2% | 46.0% |
| Low | 10.9% | 12.9% | 19.0% | 42.9% |
| Midle | 10.5% | 10.5% | 17.1% | 38.1% |
| University |  |  |  |  |
| High | 2.4% | 11.9% | 19.0% | 33.3% |
| Low | 9.5% | 12.7% | 12.7% | 34.9% |
| Midle | 10.7% | 13.1% | 14.3% | 38.1% |
| **61 to 75** | **10.4%** | **9.1%** | **15.6%** | **35.1%** |
| Illiterate |  |  |  |  |
| Low | 9.5% | 9.5% | 14.3% | 33.3% |
| Midle | 9.5% | 9.5% | 14.3% | 33.3% |
| Primary |  |  |  |  |
| Low | 14.3% | 9.5% | 14.3% | 38.1% |
| Secondary |  |  |  |  |
| High | 4.8% | 4.8% | 19.0% | 28.6% |
| Low | 9.5% | 9.5% | 23.8% | 42.9% |
| Midle | 9.5% | 14.3% | 4.8% | 28.6% |
| University |  |  |  |  |
| High | 4.8% | 9.5% | 14.3% | 28.6% |
| Midle | 13.1% | 8.3% | 16.7% | 38.1% |
| **Male** |  |  |  |  |
| **30 to 45** | **12.5%** | **11.0%** | **17.1%** | **40.7%** |
| Illiterate |  |  |  |  |
| Midle | 9.5% | 4.8% | 21.4% | 35.7% |
| Primary |  |  |  |  |
| Low | 14.3% | 19.0% | 28.6% | 61.9% |
| Midle | 4.8% | 9.5% | 14.3% | 28.6% |
| Secondary |  |  |  |  |
| High | 14.3% | 21.4% | 19.0% | 54.8% |
| Low | 14.3% | 9.5% | 17.1% | 41.0% |
| Midle | 12.9% | 10.2% | 16.3% | 39.5% |
| University |  |  |  |  |
| High | 12.7% | 9.5% | 15.9% | 38.1% |
| Low | 10.7% | 13.1% | 15.5% | 39.3% |
| Midle | 12.9% | 10.5% | 16.7% | 40.0% |
| **46 to 60** | **12.1%** | **13.7%** | **17.5%** | **43.2%** |
| Illiterate |  |  |  |  |
| Low | 19.0% | 9.5% | 19.0% | 47.6% |
| Midle | 11.9% | 7.1% | 21.4% | 40.5% |
| Primary |  |  |  |  |
| Low | 16.7% | 9.5% | 21.4% | 47.6% |
| Midle | 16.7% | 17.9% | 16.7% | 51.2% |
| Secondary |  |  |  |  |
| High | 14.3% | 14.3% | 14.3% | 42.9% |
| Low | 9.5% | 7.9% | 14.3% | 31.7% |
| Midle | 12.4% | 13.3% | 13.3% | 39.0% |
| University |  |  |  |  |
| Low | 11.1% | 15.9% | 20.6% | 47.6% |
| Midle | 9.0% | 15.9% | 18.5% | 43.4% |
| **61 to 75** | **11.4%** | **11.0%** | **18.6%** | **41.0%** |
| Primary |  |  |  |  |
| High | 7.9% | 11.1% | 17.5% | 36.5% |
| Low | 11.9% | 9.5% | 19.0% | 40.5% |
| Midle | 14.3% | 9.5% | 19.0% | 42.9% |
| Secondary |  |  |  |  |
| Low | 11.9% | 9.5% | 16.7% | 38.1% |
| Midle | 9.5% | 14.3% | 23.8% | 47.6% |
| University |  |  |  |  |
| High | 19.0% | 14.3% | 19.0% | 52.4% |
| **Grand Total** | **11.7%** | **12.0%** | **17.2%** | **40.9%** |

### Severity Levels within Sociodemographic Variables details:

| Dependent Variable | Independent Variable | Group | Statistics | Normal | Mild or Moderate | Severe or Extremely severe | P-value |
| --- | --- | --- | --- | --- | --- | --- | --- |
| Gender | Depression | Male | Count | 11 | 52 | 12 | .659 |
| % | 45.8% | 55.9% | 50.0% |
| Female | Count | 13 | 41 | 12 |
| % | 54.2% | 44.1% | 50.0% |
| Anxiety | Male | Count | 15 | 35 | 25 | .024 |
| % | 60.0% | 64.8% | 40.3% |
| Female | Count | 10 | 19 | 37 |
| % | 40.0% | 35.2% | 59.7% |
| Stress | Male | Count | 13 | 53 | 9 | .002 |
| % | 56.5% | 62.4% | 27.3% |
| Female | Count | 10 | 32 | 24 |  |
| % | 43.5% | 37.6% | 72.7% |
| Age | Depression | ≥18 to 45 | Count | 9 | 37 | 10 | .990 |
| % | 37.5% | 39.8% | 41.7% |
| 46 to 60 | Count | 12 | 41 | 11 | .990 |
| % | 50.0% | 44.1% | 45.8% |
| 61 to ≥75 | Count | 3 | 15 | 3 |
| % | 12.5% | 16.1% | 12.5% |
| Anxiety | ≥18 to 45 | Count | 9 | 23 | 24 | .955 |
| % | 36.0% | 42.6% | 38.7% |
| 46 to 60 | Count | 13 | 23 | 28 |
| % | 52.0% | 42.6% | 45.2% |
| 61 to ≥75 | Count | 3 | 8 | 10 |
| % | 12.0% | 14.8% | 16.1% |
| Stress | ≥18 to 45 | Count | 8 | 36 | 12 | .233 |
| % | 34.8% | 42.4% | 36.4% |
| 46 to 60 | Count | 8 | 38 | 18 |
| % | 34.8% | 44.7% | 54.5% |
| 61 to ≥75 | Count | 7 | 11 | 3 |
| % | 30.4% | 12.9% | 9.1% |
| Education | Depression | Illiterate or Primary | Count | 6 | 24 | 10 | .305 |
| % | 25.0% | 25.8% | 41.7% |
| Secondary or University | Count | 18 | 69 | 14 |
| % | 75.0% | 74.2% | 58.3% |
| Anxiety | Illiterate or Primary | Count | 7 | 17 | 16 | .777 |
| % | 28.0% | 31.5% | 25.8% |
| Secondary or University | Count | 18 | 37 | 46 |
| % | 72.0% | 68.5% | 74.2% |
| Stress | Illiterate or Primary | Count | 5 | 24 | 11 | .627 |
| % | 21.7% | 28.2% | 33.3% |
| Secondary or University | Count | 18 | 61 | 22 |
| % | 78.3% | 71.8% | 66.7% |
| Income level | Depression | High | Count | 3 | 20 | 3 | .281 |
| % | 12.5% | 21.5% | 12.5% |
| Medium | Count | 13 | 48 | 9 |
| % | 54.2% | 51.6% | 37.5% |
| Low | Count | 8 | 25 | 12 |
| % | 33.3% | 26.9% | 50.0% |
| Anxiety | High | Count | 5 | 11 | 10 | .757 |
| % | 20.0% | 20.4% | 16.1% |
| Medium | Count | 10 | 26 | 34 |
| % | 40.0% | 48.1% | 54.8% |
| Low | Count | 10 | 17 | 18 |
| % | 40.0% | 31.5% | 29.0% |
| Stress | High | Count | 4 | 15 | 7 | .365 |
| % | 17.4% | 17.6% | 21.2% |
| Medium | Count | 8 | 47 | 15 |
| % | 34.8% | 55.3% | 45.5% |
| Low | Count | 11 | 23 | 11 |
| % | 47.8% | 27.1% | 33.3% |
