# Supplementary material for: Prevalence of depression, anxiety, and stress among internally displaced diabetic patients: Cross-sectional study, Kassala State, Sudan
Source: Research Square preprint supplement (doi:10.21203/rs.3.rs-7594930/v1), 2025-09-19
Supplement: Supplementary file 2 [file dc280e5c28b98d1a8c60d35f.docx]

**Appendix 1:** An Adapted tool to Assess Depression, Anxiety, and Stress Among Displaced Diabetic Patients, Kassala State, Sudan (ADASQ-21)

Please read each statement item and check (
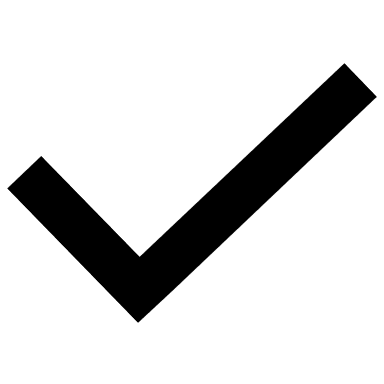
 ) between the brackets that indicate the statement applied to you over the past week. There are no right or wrong answers. (**No**) Did not apply to me at all. (**Yes**) Applied to me to some degree, or some of the time.

- - - 1. **Socio-demographic data:**

**A.** Age …………..Years **B.** Gender: Male( ) Female( )

**C**. Education:

Primary school ( ) Secondary school( ) University ( ) Illiterate( )

**D.** Income: High ( ) Middle( ) Low( )

**2. Depression, Anxiety, And Stress Assessment:**

Choose from the following: About what you are feeling now or felt during the last week (by checking Yes or No)

1. s I found it hard to wind down: Yes( ) No( )

2.a I was aware of the dryness of my mouth: Yes( ) No( )

3. d I could not seem to experience any positive feelings at all: Yes ( )

No ( ).

4. a I experienced breathing difficulty (e.g., excessively rapid breathing, breathlessness without physical exertion): Yes ( ) No ( )

5. d I struggled to work up the initiative to do things: Yes ( ) No( )

6. s I tended to overreact to situations: Yes ( ) No( )

7. a I experienced trembling (e.g., in the hands): Yes ( ) No( )

8. s I felt that I was using much nervous energy: Yes ( ) No( )

9. a I was worried about situations where I might panic and make a fool of myself:

Yes ( ) No ( )

10. d I felt that I had nothing to look forward to: Yes ( ) No ( )

11. s I found myself getting agitated: Yes ( ) No ( )

12. s I found it difficult to relax: Yes ( ) No ( )

13. d I felt downhearted and blue: Yes ( ) No( )

14. S I was intolerant of anything that kept me from getting on with what I was doing:

Yes ( ) No( )

15. a I felt I was close to panic: Yes ( ) No ( )

16. d I was unable to become enthusiastic about anything: Yes ( ) No( )

17. d I felt I was not worth much as a person: Yes ( ) No( )

18. s I felt that I was rather touchy: Yes ( ) No( )

19. a I was aware of the action of my heart in the absence of physical exertion (e.g., sense of heart rate increase, heart missing a beat): Yes ( ) No ( )

20. a I felt scared without any good reason: Yes ( ) No ( )

21. d I felt that life was meaningless: Yes ( ) No( )

| a=anxiety, d=depression, s=stress . **Yes**=Apply, **No**=Do not apply. Final Score calculation:  Item scores multiplied by (3) and Sub-scale totals and Total scores by (2). |
| --- |

**Cutoff Points of DAS-21 Severity Levels.**

| Severity | Depression | | | Anxiety | | | Stress | | |
| --- | --- | --- | --- | --- | --- | --- | --- | --- | --- |
| Normal | 0 | to | 9 | 0 | to | 7 | 0 | to | 14 |
| Mild | 10 | to | 13 | 8 | to | 9 | 15 | to | 18 |
| Moderate | 14 | to | 20 | 10 | to | 14 | 19 | to | 25 |
| Severe | 21 | to | 27 | 15 | to | 19 | 26 | to | 33 |
| Extremely severe | 28+ |  |  | 20+ |  |  | 34+ |  |  |

Source: Lovibond, S.H. & Lovibond, P.F. (1995). Manual for the Depression Anxiety & Stress Scales. (2nd Ed.) Sydney: Psychology Foundation.)
