# Supplementary material for: Prevalence of depression, anxiety, and stress among internally displaced diabetic patients: Cross-sectional study, Kassala State, Sudan
Source: Research Square preprint supplement (doi:10.21203/rs.3.rs-7594930/v1), 2025-09-19
Supplement: Supplementary file 3 [file f8a9d078adb6c0b853eb46db.xlsx]

## Sheet: Ctegorical
Gender	Age	Education	Income	1. s I found it hard to wind down	2.a I was aware of the dryness of my mouth:	3. d I could not seem to experience any positive feelings at all	4. a I experienced breathing difficulty (e.g., excessively rapid breathing, breathlessness without physical exertion):	5. d I struggled to work up the initiative to do things	6. s I tended to overreact to situations	7. a I experienced trembling (e.g., in the hands):	8. s I felt that I was using much nervous energy:	9. a I was worried about situations where I might panic and make a fool of myself	10. d I felt that I had nothing to look forward to:	11. s I found myself getting agitated	12. s I found it difficult to relax:	13. d I felt downhearted and blue:	14. S I was intolerant of anything that kept me from getting on with what I was doing:	15. a I felt I was close to panic:	16. d I was unable to become enthusiastic about anything	17. d I felt I was not worth much as a person:	18. s I felt that I was rather touchy:	19. a I was aware of the action of my heart in the absence of physical exertion (e.g., sense of heart rate increase, heart missing a beat):	20. a I felt scared without any good reason	21. d I felt that life was meaningless:
Male	45 to 60	University	Midle	Yes	No	Yes	No	No	Yes	No	No	Yes	No	No	Yes	No	No	Yes	No	No	No	No	Yes	No
Male	46 to 60	Primary	Midle	Yes	No	Yes	No	No	No	No	No	Yes	No	No	Yes	Yes	No	Yes	No	Yes	No	Yes	Yes	No
Female	46 to 60	Secondary	Low	Yes	No	Yes	No	Yes	Yes	No	No	No	No	No	Yes	Yes	Yes	Yes	No	No	No	No	Yes	No
Male	61 to 75	Primary	High	Yes	Yes	Yes	No	No	Yes	No	No	Yes	No	Yes	Yes	Yes	No	Yes	No	Yes	No	No	Yes	No
Male	46 to 60	Secondary	Midle	Yes	No	No	No	No	Yes	No	No	No	Yes	No	Yes	No	No	No	No	No	No	No	Yes	No
Female	30 to 45	Illiterate	Midle	Yes	No	Yes	Yes	No	No	No	No	Yes	No	No	No	Yes	No	No	Yes	No	No	No	Yes	Yes
Male	30 to 45	Secondary	Low	Yes	No	Yes	No	No	Yes	No	No	Yes	No	No	Yes	Yes	No	No	No	Yes	No	No	Yes	No
Male	30 to 45	Secondary	Low	Yes	No	Yes	No	Yes	Yes	No	No	No	No	Yes	Yes	Yes	No	No	No	No	No	No	Yes	No
Female	46 to 60	Primary	Low	Yes	Yes	Yes	No	No	Yes	No	No	Yes	No	No	Yes	Yes	Yes	No	No	Yes	No	No	No	No
Male	30 to 45	Secondary	Midle	Yes	No	Yes	No	No	No	No	No	No	No	No	Yes	No	Yes	No	Yes	No	No	No	Yes	No
Male	30 to 45	University	High	Yes	No	Yes	No	No	Yes	No	No	Yes	No	No	Yes	No	No	No	No	No	No	No	Yes	No
Male	30 to 45	Illiterate	Midle	Yes	No	No	No	Yes	Yes	No	No	Yes	No	Yes	Yes	No	Yes	Yes	Yes	No	No	No	No	No
Male	30 to 45	Secondary	High	Yes	Yes	Yes	Yes	No	Yes	No	No	Yes	Yes	No	Yes	Yes	No	Yes	No	No	No	No	Yes	Yes
Female	46 to 60	Secondary	Low	Yes	No	Yes	No	No	No	No	No	Yes	No	No	Yes	No	Yes	No	No	Yes	No	No	Yes	No
Male	46 to 60	University	Midle	Yes	No	Yes	No	No	Yes	No	No	No	No	No	Yes	No	No	No	Yes	No	No	No	Yes	No
Male	46 to 60	Illiterate	Midle	Yes	No	Yes	No	Yes	Yes	No	No	Yes	Yes	No	Yes	Yes	Yes	Yes	No	No	No	No	No	No
Male	30 to 45	University	Low	Yes	No	No	Yes	No	No	No	No	Yes	No	No	Yes	Yes	Yes	No	No	No	No	No	Yes	Yes
Male	46 to 60	Illiterate	Low	Yes	No	Yes	No	Yes	Yes	No	No	No	No	No	Yes	No	Yes	Yes	Yes	Yes	No	No	Yes	No
Male	30 to 45	University	Low	Yes	Yes	Yes	No	No	No	No	No	Yes	No	Yes	Yes	Yes	No	Yes	No	No	No	No	Yes	No
Male	30 to 45	University	Low	Yes	No	Yes	No	No	Yes	No	No	Yes	Yes	No	Yes	No	No	No	No	No	No	No	Yes	No
Male	30 to 45	Illiterate	Midle	Yes	No	Yes	No	No	Yes	No	No	No	No	No	Yes	Yes	Yes	No	No	No	No	No	No	No
Female	46 to 60	Primary	Low	Yes	No	Yes	No	No	No	No	No	No	No	Yes	Yes	No	Yes	No	No	No	No	No	Yes	No
Male	30 to 45	University	High	Yes	No	Yes	No	No	Yes	No	No	Yes	No	No	Yes	Yes	Yes	Yes	No	Yes	No	No	Yes	Yes
Male	30 to 45	University	Midle	Yes	No	Yes	No	Yes	Yes	No	No	Yes	No	No	Yes	No	Yes	No	No	No	No	No	Yes	No
Female	46 to 60	Illiterate	Midle	No	Yes	Yes	No	No	No	No	No	Yes	No	No	Yes	No	No	No	No	No	No	No	Yes	Yes
Male	30 to 45	University	Midle	No	No	Yes	No	No	Yes	No	No	Yes	No	No	No	No	No	Yes	Yes	No	No	No	Yes	No
Male	46 to 60	University	Midle	No	No	Yes	Yes	No	Yes	No	No	Yes	Yes	No	Yes	No	Yes	No	No	No	No	No	Yes	Yes
Female	46 to 60	Illiterate	Low	Yes	No	No	No	No	Yes	No	No	Yes	No	Yes	Yes	Yes	No	No	No	Yes	No	No	Yes	No
Male	46 to 60	Secondary	Low	Yes	Yes	Yes	No	No	Yes	No	No	Yes	No	No	Yes	No	No	No	No	No	No	No	No	No
Male	30 to 45	University	Midle	Yes	No	Yes	No	Yes	Yes	No	No	No	No	Yes	Yes	Yes	Yes	No	No	No	No	No	Yes	No
Female	46 to 60	Primary	High	Yes	No	Yes	No	No	Yes	No	No	Yes	No	No	Yes	Yes	Yes	No	No	No	No	No	Yes	Yes
Female	61 to 75	Illiterate	Low	Yes	Yes	Yes	No	No	No	No	No	Yes	Yes	Yes	Yes	No	No	No	No	No	No	No	No	No
Female	30 to 45	Secondary	Low	No	Yes	Yes	No	No	Yes	No	No	Yes	No	No	Yes	No	No	Yes	No	Yes	No	No	Yes	Yes
Male	30 to 45	Secondary	Midle	No	No	Yes	No	Yes	No	No	No	No	Yes	No	Yes	Yes	Yes	Yes	Yes	No	No	No	Yes	No
Female	46 to 60	University	Low	Yes	Yes	Yes	No	No	Yes	No	No	Yes	No	No	No	Yes	Yes	Yes	No	No	No	No	Yes	No
Male	30 to 45	University	High	No	No	Yes	No	No	Yes	No	No	No	No	No	Yes	Yes	Yes	No	No	No	No	No	Yes	Yes
Male	46 to 60	Illiterate	Midle	Yes	No	No	No	No	Yes	No	No	Yes	No	Yes	Yes	No	Yes	No	Yes	No	No	No	No	No
Male	46 to 60	Secondary	Midle	Yes	No	Yes	Yes	No	No	No	No	No	Yes	No	Yes	No	No	No	No	Yes	No	No	Yes	Yes
Male	46 to 60	University	Midle	Yes	Yes	No	No	No	Yes	No	No	Yes	No	Yes	Yes	No	Yes	No	Yes	No	No	No	Yes	No
Female	61 to 75	Illiterate	Midle	Yes	No	Yes	No	No	Yes	No	No	No	No	No	Yes	No	No	Yes	No	No	No	No	Yes	Yes
Female	46 to 60	University	High	No	Yes	No	No	No	Yes	No	No	Yes	No	Yes	Yes	No	No	No	No	No	No	No	Yes	No
Male	61 to 75	Primary	Low	No	Yes	Yes	No	Yes	Yes	No	No	No	No	No	Yes	Yes	Yes	No	No	No	No	No	Yes	No
Male	46 to 60	University	Midle	No	No	Yes	Yes	No	Yes	No	No	Yes	Yes	Yes	Yes	Yes	Yes	No	Yes	No	No	No	Yes	No
Female	61 to 75	University	High	No	Yes	Yes	No	No	Yes	No	No	No	No	No	Yes	No	Yes	No	No	No	No	No	Yes	No
Female	46 to 60	Secondary	Midle	Yes	No	No	No	No	Yes	No	No	Yes	No	No	Yes	No	Yes	Yes	No	Yes	No	No	No	Yes
Female	46 to 60	Secondary	Low	Yes	Yes	Yes	No	No	Yes	No	No	No	Yes	No	No	No	Yes	No	No	No	No	No	Yes	No
Male	46 to 60	Secondary	Midle	Yes	No	No	Yes	No	No	No	No	No	No	No	Yes	Yes	No	No	Yes	No	No	No	Yes	No
Male	30 to 45	Secondary	Midle	Yes	No	Yes	No	Yes	Yes	No	No	No	No	Yes	Yes	No	Yes	No	No	Yes	No	No	Yes	No
Male	30 to 45	Secondary	Low	No	No	Yes	No	No	Yes	No	No	Yes	No	No	Yes	No	No	No	No	No	No	No	Yes	Yes
Male	46 to 60	Primary	Low	Yes	No	Yes	No	No	Yes	No	No	No	Yes	No	Yes	No	Yes	Yes	Yes	No	No	No	No	No
Male	46 to 60	University	Midle	Yes	Yes	No	No	Yes	Yes	No	No	Yes	No	No	Yes	Yes	Yes	Yes	No	No	No	No	Yes	No
Male	46 to 60	Secondary	High	No	No	Yes	Yes	No	Yes	No	No	No	Yes	Yes	Yes	Yes	No	Yes	No	No	No	No	Yes	No
Male	46 to 60	Secondary	Low	Yes	Yes	Yes	No	No	No	No	No	No	No	No	Yes	Yes	No	No	No	No	No	No	Yes	No
Female	30 to 45	Primary	Midle	Yes	No	Yes	No	No	Yes	No	No	No	Yes	Yes	Yes	Yes	No	No	Yes	No	No	No	Yes	No
Male	46 to 60	University	Low	No	Yes	Yes	Yes	Yes	Yes	No	No	No	No	No	Yes	Yes	No	No	No	Yes	No	No	Yes	No
Male	30 to 45	University	Midle	Yes	No	Yes	No	No	No	No	No	Yes	No	No	Yes	Yes	Yes	No	No	No	No	No	Yes	Yes
Male	30 to 45	University	Midle	Yes	No	Yes	No	No	Yes	No	No	No	No	Yes	Yes	Yes	Yes	Yes	No	No	No	No	Yes	No
Male	46 to 60	University	Midle	Yes	Yes	Yes	Yes	No	Yes	No	No	Yes	No	No	No	No	No	Yes	No	No	No	No	Yes	No
Male	46 to 60	Secondary	Low	Yes	No	Yes	No	Yes	Yes	No	No	No	No	No	Yes	Yes	Yes	No	No	No	No	No	Yes	No
Female	46 to 60	Secondary	Midle	Yes	No	Yes	Yes	Yes	Yes	No	No	No	No	No	Yes	No	Yes	No	No	No	No	No	Yes	No
Female	46 to 60	Secondary	Low	No	Yes	No	No	Yes	Yes	No	No	Yes	No	Yes	Yes	No	Yes	No	No	No	No	No	Yes	Yes
Male	46 to 60	Primary	Midle	Yes	No	No	No	No	Yes	No	No	Yes	Yes	Yes	Yes	Yes	Yes	No	Yes	Yes	No	No	Yes	No
Male	30 to 45	Secondary	Midle	Yes	Yes	Yes	Yes	No	No	No	No	Yes	No	No	Yes	Yes	Yes	Yes	No	No	No	No	Yes	No
Female	30 to 45	Secondary	High	Yes	No	No	No	Yes	Yes	No	No	No	Yes	Yes	Yes	Yes	No	No	No	No	No	No	Yes	Yes
Female	46 to 60	Secondary	Midle	Yes	No	Yes	No	Yes	Yes	No	No	Yes	No	No	Yes	Yes	Yes	No	No	No	No	No	Yes	No
Female	30 to 45	University	Low	Yes	No	Yes	No	No	Yes	No	No	Yes	No	Yes	Yes	Yes	No	Yes	No	No	No	No	Yes	No
Male	30 to 45	Secondary	Midle	No	No	No	Yes	Yes	Yes	No	No	No	No	Yes	Yes	No	No	No	No	Yes	No	No	Yes	Yes
Female	30 to 45	University	Midle	Yes	Yes	Yes	No	Yes	No	No	No	No	No	Yes	Yes	No	Yes	Yes	Yes	No	No	No	Yes	No
Male	61 to 75	Primary	Midle	Yes	No	Yes	No	No	Yes	No	No	Yes	Yes	Yes	Yes	Yes	No	No	No	No	No	No	Yes	No
Female	30 to 45	Primary	Midle	Yes	Yes	No	Yes	Yes	Yes	No	No	No	No	Yes	Yes	No	Yes	No	No	No	No	No	Yes	Yes
Female	30 to 45	Primary	Low	Yes	No	Yes	No	No	Yes	No	No	No	No	Yes	No	No	Yes	No	No	No	No	No	Yes	No
Male	61 to 75	Primary	High	Yes	No	Yes	No	No	No	No	No	Yes	No	Yes	Yes	No	No	No	No	No	No	No	Yes	Yes
Male	30 to 45	University	Low	Yes	No	Yes	Yes	Yes	Yes	No	No	No	No	Yes	Yes	No	No	No	Yes	No	No	No	Yes	No
Male	30 to 45	University	Midle	No	Yes	Yes	No	Yes	Yes	No	No	No	Yes	No	Yes	No	No	No	No	No	No	No	Yes	No
Female	61 to 75	Secondary	Low	Yes	No	Yes	No	No	Yes	No	No	Yes	No	Yes	Yes	Yes	Yes	No	No	No	No	No	Yes	No
Female	46 to 60	Secondary	High	Yes	Yes	Yes	No	No	Yes	No	Yes	No	No	No	Yes	Yes	Yes	Yes	No	No	No	No	Yes	No
Female	46 to 60	University	Low	No	No	No	No	No	No	No	Yes	Yes	No	Yes	No	No	Yes	No	No	No	No	No	No	Yes
Female	61 to 75	University	Midle	Yes	No	No	No	Yes	Yes	No	No	No	No	Yes	Yes	Yes	No	No	No	Yes	No	No	Yes	Yes
Male	30 to 45	Secondary	Midle	Yes	No	Yes	Yes	Yes	Yes	No	Yes	No	No	No	Yes	Yes	Yes	No	No	No	No	No	Yes	No
Female	46 to 60	University	Midle	No	Yes	No	No	No	Yes	No	No	Yes	No	Yes	Yes	Yes	No	No	No	Yes	No	No	Yes	No
Male	30 to 45	Secondary	Low	Yes	No	Yes	No	No	No	No	No	No	Yes	Yes	Yes	Yes	Yes	No	No	No	No	No	Yes	Yes
Male	30 to 45	Secondary	Midle	Yes	Yes	No	No	Yes	No	No	Yes	No	No	No	Yes	No	No	No	No	No	No	No	Yes	No
Female	46 to 60	Secondary	Low	Yes	Yes	Yes	No	No	No	No	Yes	No	Yes	No	Yes	Yes	Yes	No	No	No	No	No	Yes	No
Female	30 to 45	University	High	No	Yes	Yes	No	Yes	Yes	No	Yes	No	No	No	Yes	Yes	Yes	No	Yes	No	No	No	No	Yes
Female	61 to 75	Secondary	Midle	Yes	No	No	Yes	Yes	No	No	No	Yes	No	No	No	Yes	No	No	No	No	No	No	Yes	No
Male	61 to 75	Secondary	Low	No	No	Yes	No	Yes	No	No	Yes	Yes	No	No	Yes	No	Yes	No	Yes	No	No	No	Yes	No
Female	61 to 75	University	Midle	Yes	No	No	No	Yes	No	No	No	Yes	No	No	Yes	Yes	Yes	Yes	No	No	No	No	Yes	No
Male	30 to 45	University	Midle	Yes	Yes	No	No	No	No	No	Yes	Yes	Yes	Yes	Yes	Yes	Yes	No	No	No	No	No	Yes	Yes
Female	30 to 45	University	Low	Yes	No	No	No	No	No	No	Yes	No	No	Yes	Yes	No	No	Yes	Yes	No	No	No	Yes	No
Female	46 to 60	Secondary	High	Yes	Yes	No	Yes	Yes	Yes	No	No	No	Yes	Yes	Yes	No	No	No	No	No	No	No	Yes	No
Male	61 to 75	Secondary	Low	Yes	No	No	No	Yes	No	No	No	Yes	No	Yes	Yes	No	Yes	No	Yes	No	No	No	Yes	No
Female	30 to 45	Primary	Midle	Yes	Yes	No	No	Yes	Yes	No	No	No	No	No	Yes	No	No	Yes	No	No	No	No	Yes	No
Female	46 to 60	University	Midle	Yes	No	No	No	Yes	No	No	Yes	No	Yes	Yes	No	No	Yes	No	No	No	No	No	Yes	No
Male	30 to 45	University	Midle	Yes	Yes	No	No	No	No	No	No	No	No	Yes	Yes	Yes	Yes	Yes	No	No	No	No	Yes	Yes
Female	46 to 60	Primary	High	No	No	Yes	Yes	No	Yes	No	Yes	Yes	No	Yes	Yes	Yes	Yes	No	No	No	No	No	Yes	No
Female	46 to 60	Primary	Midle	Yes	Yes	Yes	No	No	No	No	No	Yes	No	Yes	Yes	No	No	Yes	No	No	No	No	No	Yes
Female	30 to 45	Primary	Low	Yes	Yes	Yes	Yes	Yes	Yes	No	No	No	No	No	Yes	Yes	Yes	No	Yes	No	No	No	Yes	No
Female	30 to 45	Primary	Midle	Yes	No	Yes	No	Yes	Yes	No	No	Yes	No	Yes	Yes	No	Yes	No	No	No	No	No	Yes	No
Male	30 to 45	Primary	Midle	No	No	No	Yes	No	Yes	No	No	No	Yes	Yes	Yes	No	No	No	No	No	No	No	Yes	No
Male	46 to 60	Primary	Midle	Yes	Yes	Yes	Yes	Yes	Yes	No	No	Yes	No	No	No	No	No	No	Yes	No	No	No	Yes	Yes
Male	61 to 75	Secondary	Midle	Yes	Yes	No	No	Yes	Yes	No	Yes	No	No	Yes	Yes	Yes	No	Yes	No	No	No	No	Yes	No
Female	46 to 60	Secondary	Low	Yes	No	Yes	Yes	No	Yes	No	Yes	No	No	No	Yes	No	No	No	Yes	No	No	No	Yes	No
Female	46 to 60	University	High	Yes	No	No	No	No	Yes	No	Yes	Yes	No	Yes	Yes	Yes	No	Yes	No	No	No	No	No	No
Female	30 to 45	Secondary	Midle	Yes	Yes	No	Yes	Yes	No	No	No	Yes	No	No	Yes	No	No	Yes	No	No	No	No	Yes	No
Male	61 to 75	Primary	Low	Yes	Yes	Yes	No	Yes	Yes	No	Yes	No	No	Yes	Yes	No	No	No	No	No	No	No	Yes	No
Female	61 to 75	Secondary	High	Yes	No	No	No	No	Yes	No	No	Yes	No	Yes	Yes	Yes	No	No	No	No	No	No	No	No
Female	46 to 60	University	Low	No	Yes	Yes	No	No	No	No	No	Yes	No	No	Yes	No	Yes	No	No	Yes	No	No	Yes	Yes
Female	46 to 60	University	Midle	Yes	Yes	No	No	Yes	Yes	No	Yes	Yes	No	No	Yes	Yes	No	Yes	Yes	No	No	No	Yes	No
Female	30 to 45	University	High	Yes	No	No	No	Yes	Yes	No	No	Yes	No	No	No	Yes	Yes	Yes	No	No	No	No	Yes	No
Male	61 to 75	University	High	Yes	No	Yes	No	Yes	Yes	No	Yes	Yes	Yes	No	Yes	No	No	Yes	Yes	No	No	No	Yes	No
Male	61 to 75	Primary	High	No	No	No	No	No	Yes	Yes	Yes	No	No	No	Yes	No	Yes	No	No	No	No	No	No	No
Female	61 to 75	Primary	Low	Yes	No	No	Yes	Yes	Yes	No	No	No	No	No	Yes	Yes	No	No	Yes	No	No	No	Yes	No
Male	46 to 60	Secondary	Midle	Yes	Yes	Yes	Yes	Yes	Yes	No	Yes	Yes	No	Yes	Yes	Yes	No	Yes	No	No	No	Yes	No	Yes
Male	46 to 60	University	Low	No	Yes	No	Yes	Yes	Yes	Yes	Yes	Yes	Yes	No	Yes	No	Yes	No	No	No	No	No	Yes	No
Female	30 to 45	University	Midle	Yes	Yes	No	No	Yes	Yes	Yes	Yes	No	No	No	Yes	No	No	No	No	No	No	Yes	Yes	No
Female	30 to 45	Secondary	Midle	Yes	Yes	Yes	No	No	No	No	No	No	No	No	No	No	No	No	Yes	Yes	No	Yes	No	No
Female	30 to 45	University	High	No	Yes	No	Yes	Yes	Yes	Yes	Yes	No	No	No	Yes	Yes	Yes	Yes	No	No	Yes	No	Yes	Yes
Male	46 to 60	University	Midle	Yes	Yes	Yes	No	Yes	Yes	Yes	No	No	No	No	Yes	No	Yes	Yes	No	No	Yes	No	Yes	No
Male	30 to 45	University	Midle	Yes	No	Yes	Yes	No	Yes	No	No	No	Yes	Yes	No	No	No	No	Yes	No	No	No	No	Yes
Male	46 to 60	University	Midle	Yes	No	No	Yes	No	Yes	Yes	Yes	No	Yes	No	Yes	No	Yes	No	No	No	Yes	Yes	Yes	No
Male	46 to 60	Primary	Midle	Yes	No	Yes	No	Yes	Yes	Yes	No	Yes	No	Yes	Yes	Yes	No	Yes	No	No	Yes	Yes	Yes	No
Female	46 to 60	Secondary	Low	Yes	Yes	No	Yes	No	Yes	Yes	No	Yes	No	Yes	Yes	No	Yes	No	Yes	No	Yes	Yes	Yes	Yes
Female	46 to 60	Primary	Midle	No	No	No	No	Yes	No	Yes	No	No	No	Yes	Yes	No	Yes	No	No	No	No	Yes	No	Yes
Male	30 to 45	Secondary	High	Yes	Yes	Yes	Yes	No	Yes	No	Yes	No	Yes	Yes	No	No	Yes	Yes	No	No	No	No	Yes	No
Female	46 to 60	University	Midle	No	No	No	Yes	No	No	No	No	No	Yes	No	Yes	No	No	Yes	No	No	No	No	Yes	Yes
Male	46 to 60	University	Low	Yes	No	No	No	No	Yes	Yes	Yes	No	No	Yes	Yes	No	Yes	No	No	No	Yes	No	Yes	Yes
Female	46 to 60	Primary	Midle	Yes	No	No	No	Yes	No	Yes	Yes	Yes	Yes	Yes	Yes	Yes	Yes	No	Yes	No	No	No	Yes	No
Male	30 to 45	Secondary	Low	Yes	Yes	Yes	Yes	No	Yes	Yes	No	Yes	No	Yes	Yes	Yes	Yes	No	No	Yes	No	No	No	No
Female	46 to 60	Secondary	Midle	Yes	Yes	Yes	Yes	No	No	No	Yes	Yes	No	Yes	Yes	No	Yes	Yes	No	No	Yes	No	Yes	Yes
Female	61 to 75	University	Midle	Yes	Yes	Yes	No	Yes	No	No	Yes	No	Yes	No	Yes	No	Yes	No	No	Yes	Yes	No	No	No
Male	30 to 45	University	Midle	Yes	Yes	Yes	Yes	No	No	No	No	Yes	Yes	No	Yes	Yes	Yes	No	No	No	No	No	No	No
Female	30 to 45	Primary	High	No	No	No	No	Yes	No	No	No	Yes	Yes	Yes	No	Yes	No	Yes	Yes	No	No	Yes	Yes	No
Male	30 to 45	Primary	Low	Yes	Yes	No	Yes	No	Yes	No	Yes	Yes	Yes	Yes	Yes	Yes	Yes	No	Yes	No	No	Yes	No	No
Female	46 to 60	Secondary	Midle	No	No	Yes	No	No	No	No	No	No	No	No	No	No	No	No	No	No	No	No	No	Yes
Female	46 to 60	Primary	High	Yes	Yes	No	Yes	No	No	Yes	No	No	Yes	No	Yes	No	Yes	Yes	No	No	Yes	Yes	No	Yes
Male	46 to 60	Primary	Low	Yes	No	Yes	No	Yes	Yes	No	Yes	Yes	Yes	No	Yes	Yes	No	No	No	No	Yes	Yes	Yes	No
Female	61 to 75	University	Midle	No	No	No	Yes	No	No	No	Yes	No	No	No	No	No	No	No	No	No	Yes	Yes	No	Yes
Male	46 to 60	Secondary	Midle	Yes	No	No	Yes	No	No	No	No	No	No	No	Yes	No	No	Yes	Yes	No	No	Yes	Yes	Yes
Female	30 to 45	Secondary	Low	Yes	No	No	No	Yes	Yes	No	No	No	Yes	Yes	No	Yes	Yes	No	No	No	Yes	Yes	Yes	No
Female	30 to 45	Secondary	High	Yes	No	Yes	Yes	No	No	No	No	No	Yes	No	Yes	No	Yes	No	No	Yes	Yes	Yes	No	No
Female	46 to 60	Secondary	High	Yes	No	No	Yes	Yes	No	Yes	Yes	No	Yes	Yes	Yes	Yes	No	No	No	No	Yes	No	No	No
